# Supplementary material for: Morphology fixing agent for [6,6]-phenyl C61-butyric acid methyl ester (PC60BM) in planar-type perovskite solar cells for enhanced stability
Source: Royal Society of Chemistry journal article supplement (doi:10.1039/c6ra08584a), 2016-01-01
Supplement: c6ra08584a1.pdf [file c6ra08584a1.pdf]

## Supplementary Information

### **Morphology Fixing Agent for PC<sub>60</sub>BM in Planar-Type Perovskite Solar Cells for Enhanced Stability**

**Sunyong Ahn <sup>a,+</sup>, Woongsik Jang <sup>a,+</sup>, Jong Hyeok Park <sup>b,\*</sup> and Dong Hwan Wang**

**<sup>a,\*</sup>**

*<sup>a</sup>School of Integrative Engineering, Chung-Ang University, 84 Heukseok-Ro, Dongjak-gu, Seoul 156-756, Republic of Korea*

*<sup>b</sup>Department of Chemical and Biomolecular Engineering, Yonsei University, 50 Yonsei-ro, Seodaemun-gu, Seoul 120-749, Republic of Korea*

---

\* Corresponding author, E-mail address: lutts@yonsei.ac.kr, and king0401@cau.ac.kr (Prof. D.H. Wang)

<sup>+</sup> S. Ahn and W. Jang contribute equally in this work.

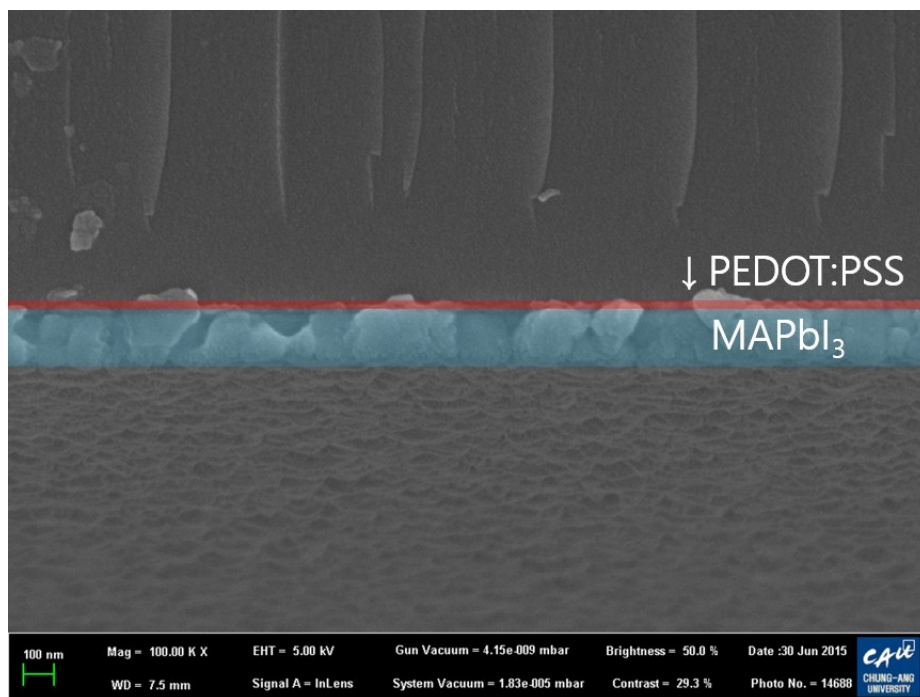

Figure S1. SEM cross sectional image of the PEDOT:PSS and the MAPbI<sub>3</sub> layer.

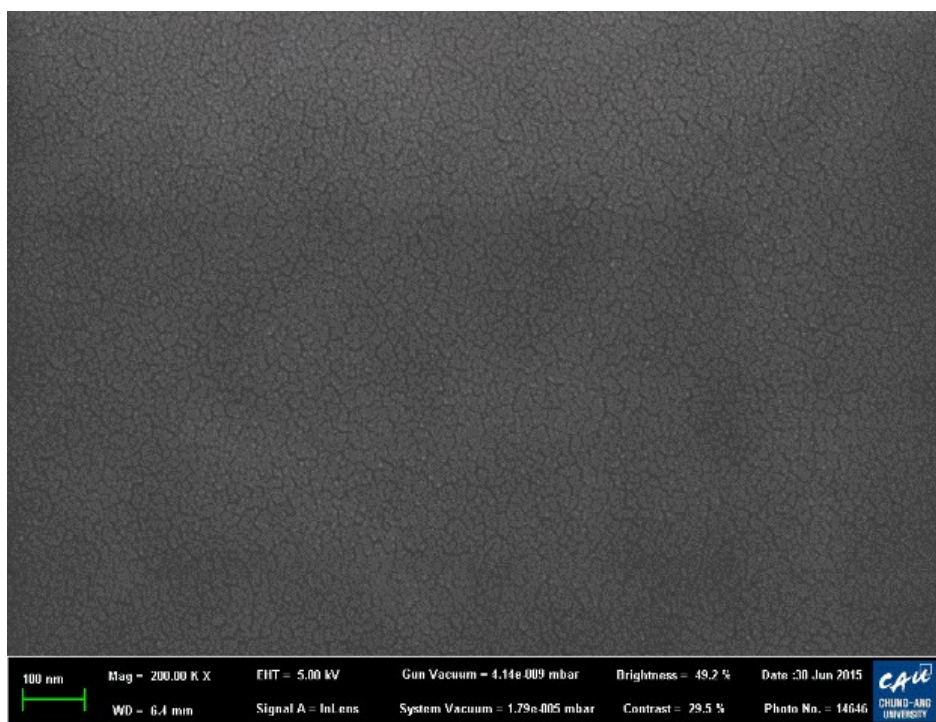

Figure S2. SEM surface image of the PC<sub>60</sub>BM layer on top of the MAPbI<sub>3</sub> layer.

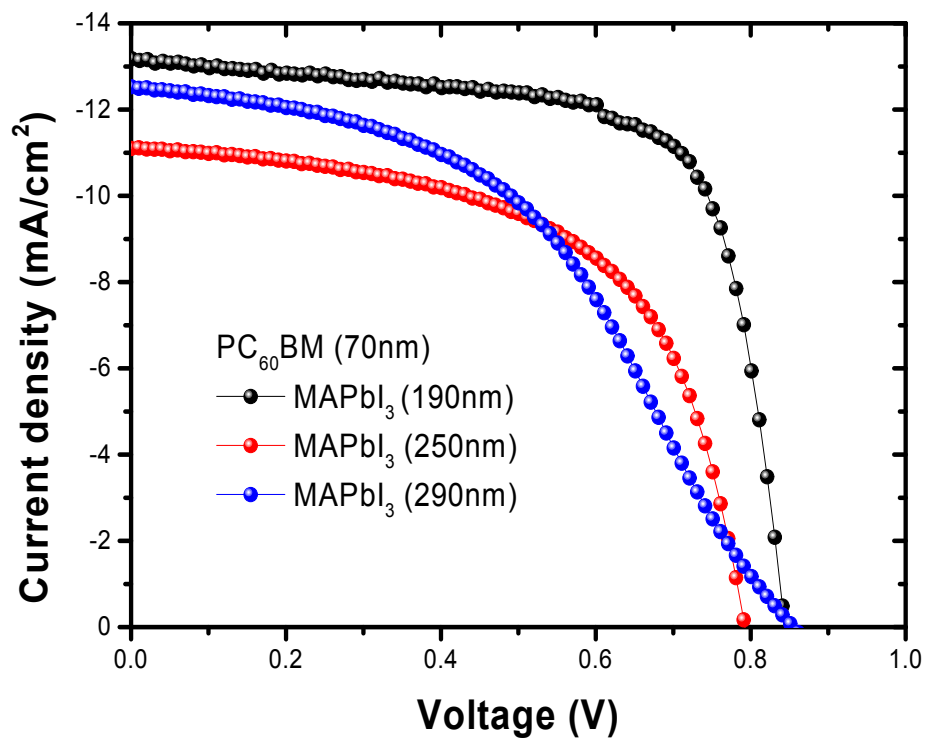

Figure S3. J-V characterization of the PSCs depending on the different thicknesses of MAPbI<sub>3</sub>. The PC<sub>60</sub>BM layer was initially coated to a thickness of ~ 70 nm for thickness optimizing of MAPbI<sub>3</sub>.

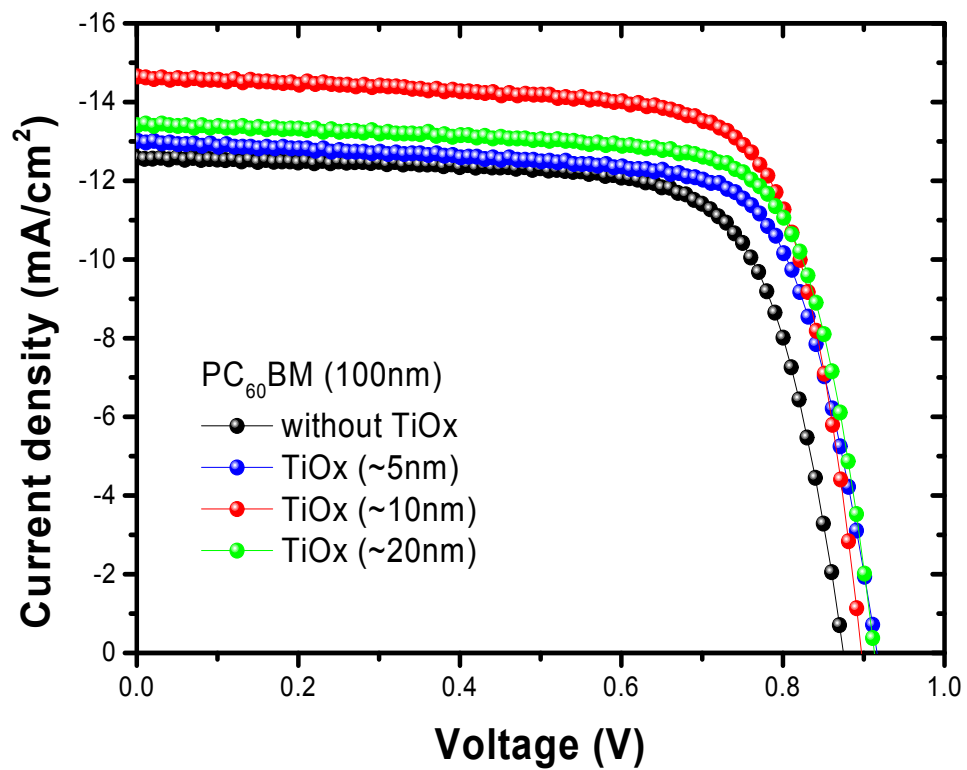

Figure S4. J-V curves of the PSCs with different thicknesses of TiO<sub>x</sub> layer (0 to 20 nm).

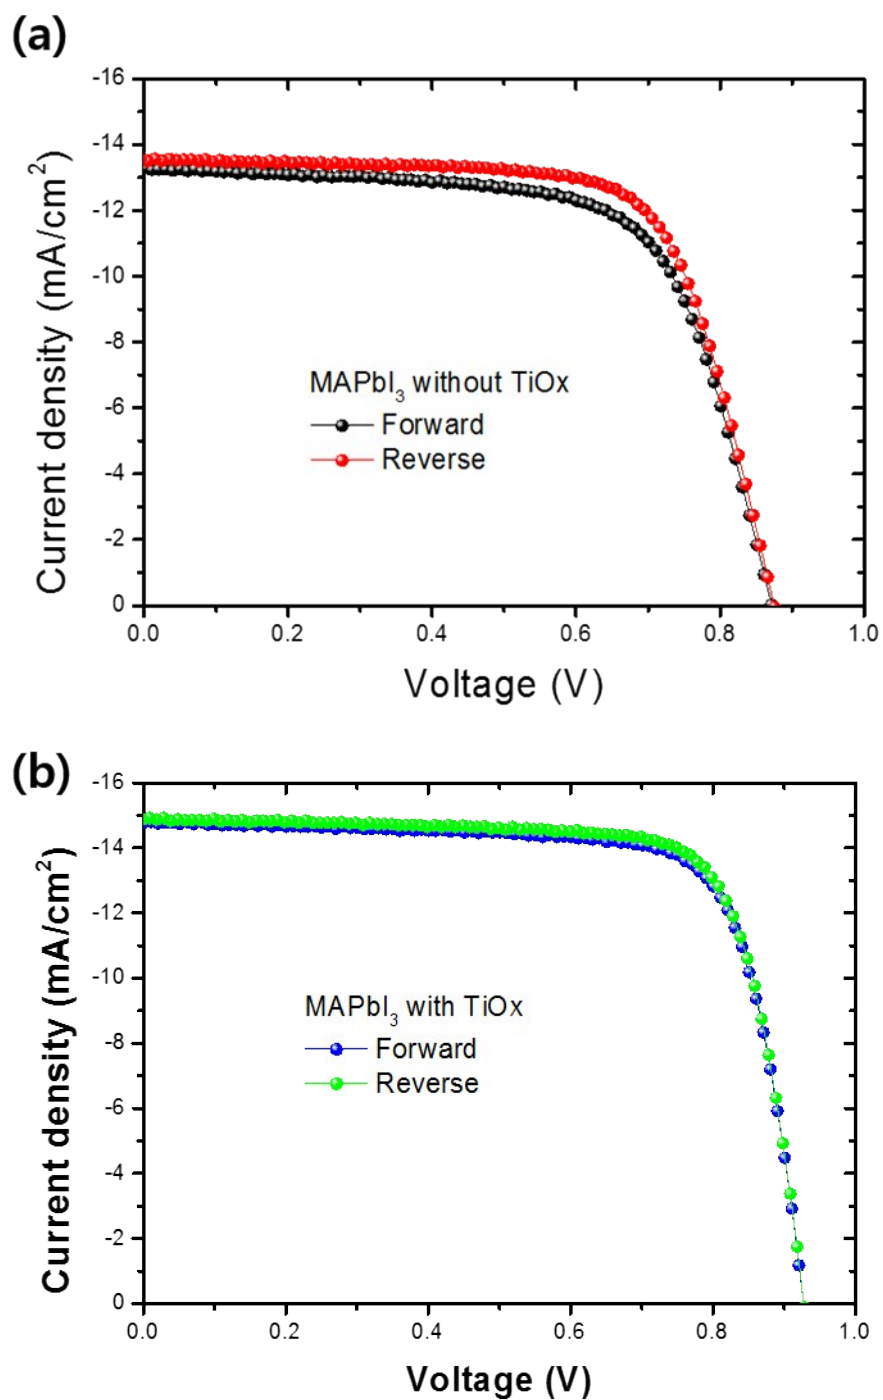

Figure S5. J-V curves of the PSCs measured by forward and reverse scans, fabricated by (a) without and (b) with the TiO<sub>x</sub> layer.

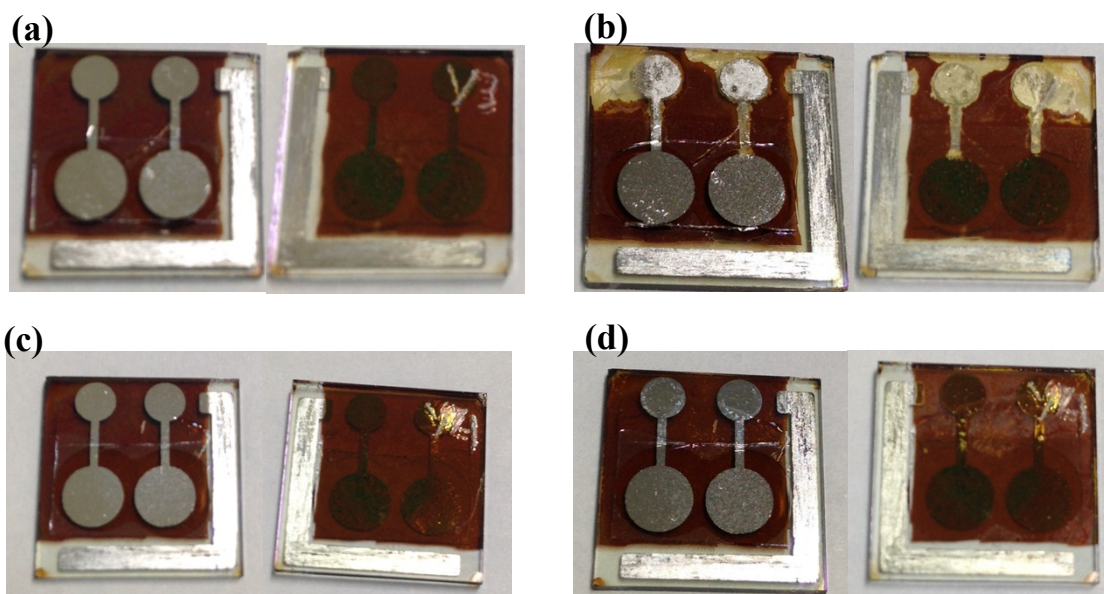

Figure S6. Photographs of the devices without and with the  $\text{TiO}_x$  morphological fixing agent and after the stability test: (a, b) PSCs without  $\text{TiO}_x$ , and (c, d) PSCs with  $\text{TiO}_x$ ; (a, c) as cast and (b, d) after 3 days.

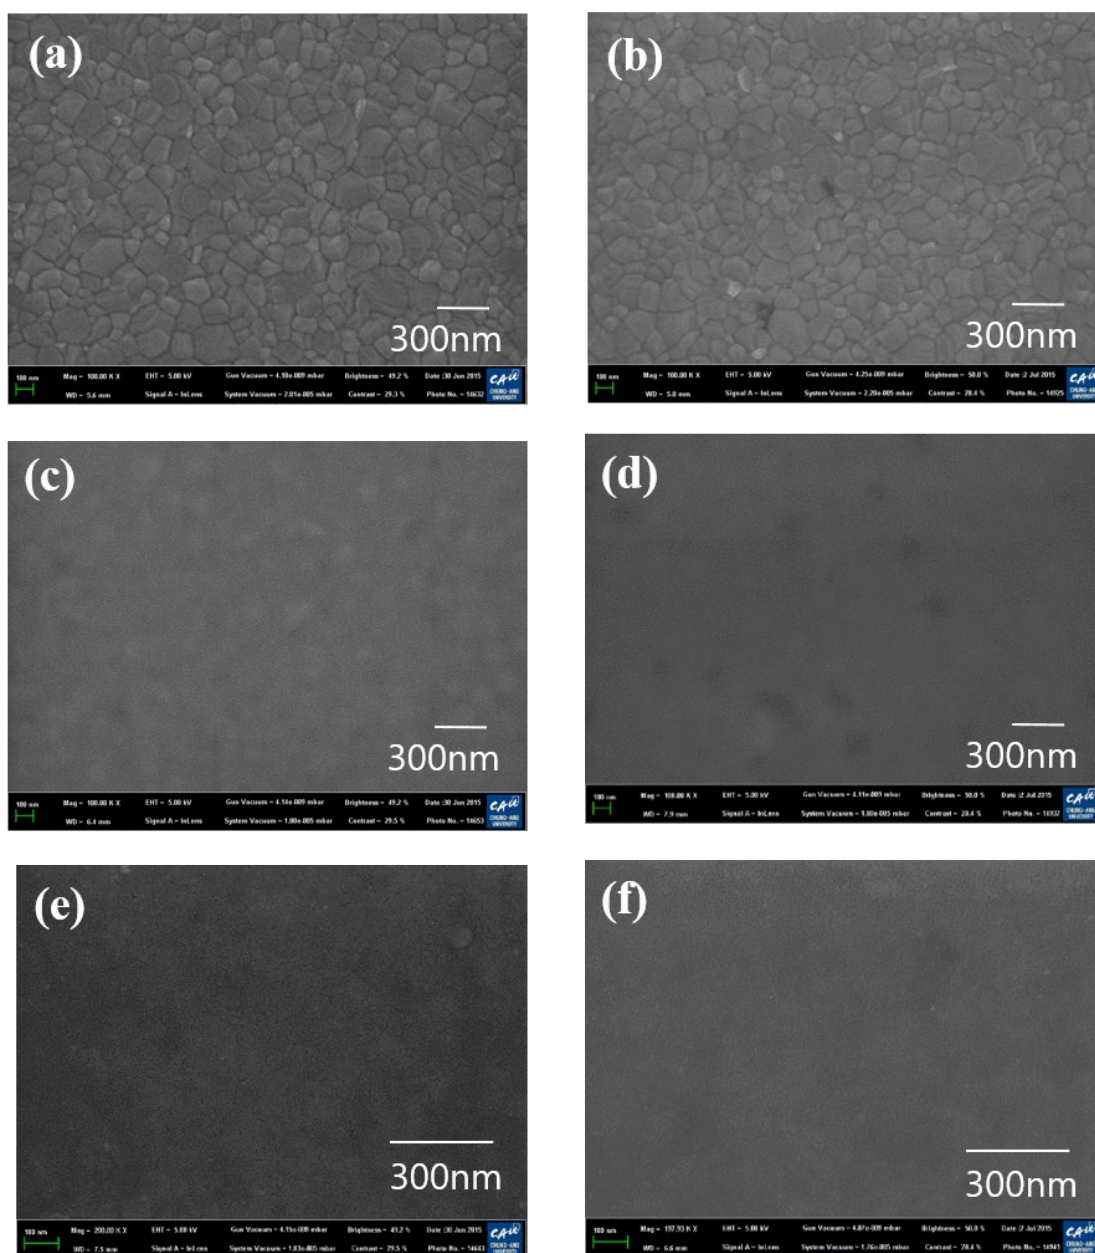

Figure S7. SEM surface images of (a, b) MAPbI<sub>3</sub>, (c, d) MAPbI<sub>3</sub>/PC<sub>60</sub>BM, (e, f) MAPbI<sub>3</sub>/PC<sub>60</sub>BM/TiO<sub>x</sub>; (b, d, f) are the SEM images after 3 days.

| <b>PC<sub>60</sub>BM (70nm)</b> | <b>V<sub>OC</sub> (V)</b> | <b>J<sub>SC</sub> (mA/cm<sup>2</sup>)</b> | <b>FF (%)</b> | <b>PCE (%)</b> |
|---------------------------------|---------------------------|-------------------------------------------|---------------|----------------|
| MAPbI <sub>3</sub> (190nm)      | 0.844                     | 13.18                                     | 70.2          | 7.81           |
| MAPbI <sub>3</sub> (250nm)      | 0.793                     | 11.10                                     | 58.4          | 5.14           |
| MAPbI <sub>3</sub> (290nm)      | 0.854                     | 12.53                                     | 46.2          | 4.95           |

Table S1. Electrical parameters of the PSCs depending on the controlled thickness of MAPbI<sub>3</sub> as shown in Fig. S3.

| <b>PC<sub>60</sub>BM (100nm)</b> | <b>V<sub>OC</sub> (V)</b> | <b>J<sub>SC</sub> (mA/cm<sup>2</sup>)</b> | <b>FF (%)</b> | <b>Eff. (%)</b> |
|----------------------------------|---------------------------|-------------------------------------------|---------------|-----------------|
| without TiO <sub>x</sub>         | 0.875                     | 12.58                                     | 72.8          | 8.01            |
| With TiO <sub>x</sub> (~5nm)     | 0.917                     | 13.01                                     | 72.8          | 8.68            |
| With TiO <sub>x</sub> (~10nm)    | 0.928                     | 14.78                                     | 75.9          | 10.41           |
| With TiO <sub>x</sub> (~20nm)    | 0.913                     | 13.41                                     | 74.9          | 9.17            |

Table S2. Electrical parameters of the PSCs depending on different thickness of TiO<sub>x</sub> layer as corresponded with Fig. S4.



| <b>PSCs</b>           | <b>Scan direction</b> | <b>V<sub>OC</sub> (V)</b> | <b>J<sub>SC</sub> (mA/cm<sup>2</sup>)</b> | <b>FF (%)</b> | <b>PCE (%)</b> |
|-----------------------|-----------------------|---------------------------|-------------------------------------------|---------------|----------------|
| Without               | Forward               | 0.872                     | 13.27                                     | 67.5          | 7.81           |
|                       | Reverse               | 0.875                     | 13.53                                     | 70.7          | 8.37           |
| With TiO <sub>x</sub> | Forward               | 0.928                     | 14.78                                     | 75.9          | 10.41          |
|                       | Reverse               | 0.928                     | 14.89                                     | 76.7          | 10.59          |

Table S3. Electrical parameters of the PSCs without and with the TiO<sub>x</sub> layer depending on the different scan directions as shown in Fig. S5.
